# Supplementary material for: Dynamic regulation of proximal tubular autophagy from injury to repair after ischemic kidney damage
Source: PubMed Central journal article supplement (PMC11619129; doi:10.1186/s11658-024-00663-w), 2024-12-05

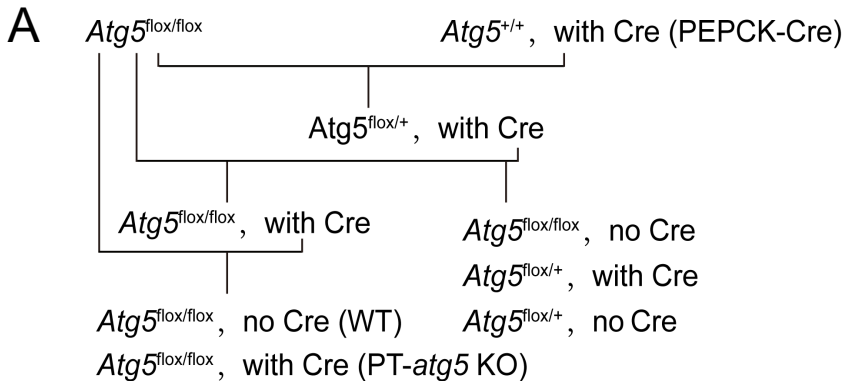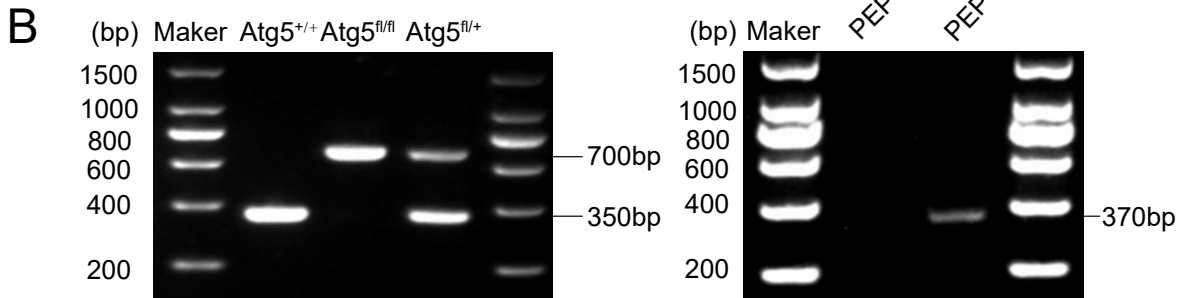

Supplement: 11658_2024_663_MOESM1_ESM.pdf [file 11658_2024_663_MOESM1_ESM.pdf]
